# Supplementary material
Source: publisher figshare collection journal article supplement (https://acs.figshare.com/ndownloader/files/4291090)
Supplement: Supplementary file 1 [file 4291090]

 
data_final1 
 
_audit_creation_method            SHELXL-97 
_chemical_name_systematic 
; 
 ? 
; 
_chemical_name_common             ? 
_chemical_melting_point           ? 
_chemical_formula_moiety          ? 
_chemical_formula_sum 
 'O168 U32' 
_chemical_formula_weight          10304.96 
 
loop_ 
 _atom_type_symbol 
 _atom_type_description 
 _atom_type_scat_dispersion_real 
 _atom_type_scat_dispersion_imag 
 _atom_type_scat_source 
 'O'  'O'   0.0106   0.0060 
 'International Tables Vol C Tables 4.2.6.8 and 6.1.1.4' 
 'U'  'U'  -9.6767   9.6646 
 'International Tables Vol C Tables 4.2.6.8 and 6.1.1.4' 
 
_symmetry_cell_setting            'orthorhombic' 
_symmetry_space_group_name_H-M    'Immm' 
 
loop_ 
 _symmetry_equiv_pos_as_xyz 
 'x, y, z' 
 '-x, -y, z' 
 '-x, y, -z' 
 'x, -y, -z' 
 'x+1/2, y+1/2, z+1/2' 
 '-x+1/2, -y+1/2, z+1/2' 
 '-x+1/2, y+1/2, -z+1/2' 
 'x+1/2, -y+1/2, -z+1/2' 
 '-x, -y, -z' 
 'x, y, -z' 
 'x, -y, z' 
 '-x, y, z' 
 '-x+1/2, -y+1/2, -z+1/2' 
 'x+1/2, y+1/2, -z+1/2' 
 'x+1/2, -y+1/2, z+1/2' 
 '-x+1/2, y+1/2, z+1/2' 
 
_cell_length_a                    19.343(4) 
_cell_length_b                    20.800(5) 
_cell_length_c                    34.866(8) 
_cell_angle_alpha                 90.00 
_cell_angle_beta                  90.00 
_cell_angle_gamma                 90.00 
_cell_volume                      14028(5) 
_cell_formula_units_Z             2 
_cell_measurement_temperature     273(2) 
_cell_measurement_reflns_used     ? 
_cell_measurement_theta_min       ? 
_cell_measurement_theta_max       ? 
 
_exptl_crystal_description        ? 
_exptl_crystal_colour             'yellow' 
_exptl_crystal_size_max           0.10 
_exptl_crystal_size_mid           0.03 
_exptl_crystal_size_min           0.01 
_exptl_crystal_density_meas       ? 
_exptl_crystal_density_diffrn     2.440 
_exptl_crystal_density_method     'not measured' 
_exptl_crystal_F_000              8576 
_exptl_absorpt_coefficient_mu     18.464 
_exptl_absorpt_correction_type    'multi-scan' 
_exptl_absorpt_correction_T_min   0.5 
_exptl_absorpt_correction_T_max   0.8 
_exptl_absorpt_process_details    'SADABS' 
 
_exptl_special_details 
; 
 ? 
; 
 
_diffrn_ambient_temperature       273(2) 
_diffrn_radiation_wavelength      0.71073 
_diffrn_radiation_type            MoK\a 
_diffrn_radiation_source          'fine-focus sealed tube' 
_diffrn_radiation_monochromator   graphite 
_diffrn_measurement_device_type   'Bruker APEX-II CCD' 
_diffrn_measurement_method        '\f and \w scans' 
_diffrn_detector_area_resol_mean  ? 
_diffrn_reflns_number             77486 
_diffrn_reflns_av_R_equivalents   0.1957 
_diffrn_reflns_av_sigmaI/netI     0.1054 
_diffrn_reflns_limit_h_min        -22 
_diffrn_reflns_limit_h_max        22 
_diffrn_reflns_limit_k_min        -24 
_diffrn_reflns_limit_k_max        24 
_diffrn_reflns_limit_l_min        -41 
_diffrn_reflns_limit_l_max        41 
_diffrn_reflns_theta_min          1.44 
_diffrn_reflns_theta_max          25.00 
_reflns_number_total              6678 
_reflns_number_gt                 3853 
_reflns_threshold_expression      >2sigma(I) 
 
_computing_data_collection       'Bruker APEX2'
_computing_cell_refinement       'Bruker SAINT'
_computing_data_reduction        'Bruker SAINT'
_computing_structure_solution    'SHELXS-97 (Sheldrick, 2008)'
_computing_structure_refinement  'SHELXL-97 (Sheldrick, 2008)'
_computing_molecular_graphics    'Bruker SHELXTL'
_computing_publication_material  'CrystalMaker 8.3.0'
 
_refine_special_details 
; 
 Refinement of F^2^ against ALL reflections.  The weighted R-factor wR and 
 goodness of fit S are based on F^2^, conventional R-factors R are based 
 on F, with F set to zero for negative F^2^. The threshold expression of 
 F^2^ > 2sigma(F^2^) is used only for calculating R-factors(gt) etc. and is 
 not relevant to the choice of reflections for refinement.  R-factors based 
 on F^2^ are statistically about twice as large as those based on F, and R- 
 factors based on ALL data will be even larger. 
; 
 
_refine_ls_structure_factor_coef  Fsqd  
_refine_ls_matrix_type            full 
_refine_ls_weighting_scheme       calc  
_refine_ls_weighting_details 
 'calc w=1/[\s^2^(Fo^2^)+(0.1236P)^2^+0.0000P] where P=(Fo^2^+2Fc^2^)/3' 
_atom_sites_solution_primary      direct 
_atom_sites_solution_secondary    difmap 
_atom_sites_solution_hydrogens    none 
_refine_ls_hydrogen_treatment     none 
_refine_ls_extinction_method      none 
_refine_ls_extinction_coef        none 
_refine_ls_number_reflns          6678 
_refine_ls_number_parameters      132 
_refine_ls_number_restraints      0 
_refine_ls_R_factor_all           0.1482 
_refine_ls_R_factor_gt            0.0802 
_refine_ls_wR_factor_ref          0.2268 
_refine_ls_wR_factor_gt           0.1988 
_refine_ls_goodness_of_fit_ref    0.984 
_refine_ls_restrained_S_all       0.984 
_refine_ls_shift/su_max           0.000 
_refine_ls_shift/su_mean          0.000 
 
loop_ 
 _atom_site_label 
 _atom_site_type_symbol 
 _atom_site_fract_x 
 _atom_site_fract_y 
 _atom_site_fract_z 
 _atom_site_U_iso_or_equiv 
 _atom_site_adp_type 
 _atom_site_occupancy 
 _atom_site_symmetry_multiplicity 
 _atom_site_calc_flag 
 _atom_site_refinement_flags 
 _atom_site_disorder_assembly 
 _atom_site_disorder_group 
U1 U 0.0000 0.33733(6) 0.12115(4) 0.0381(4) Uani 1 2 d S . . 
U2 U 0.0000 0.20352(6) 0.20225(4) 0.0413(4) Uani 1 2 d S . . 
U3 U 0.18269(5) 0.33459(5) 0.05550(3) 0.0428(3) Uani 1 1 d . . . 
U4 U 0.18262(5) 0.09303(5) 0.19967(3) 0.0456(3) Uani 1 1 d . . . 
U5 U 0.30098(6) 0.19348(7) 0.11502(5) 0.0798(5) Uani 1 1 d . . . 
O1 O 0.1390(8) 0.0792(7) 0.1536(4) 0.035(4) Uiso 1 1 d . . . 
O2 O 0.1262(14) 0.0000 0.2250(8) 0.058(7) Uiso 1 2 d S . . 
O3 O 0.1241(12) 0.3743(11) 0.0000 0.041(6) Uiso 1 2 d S . . 
O4 O 0.0000 0.2657(10) 0.0920(6) 0.034(5) Uiso 1 2 d S . . 
O5 O 0.0000 0.1530(10) 0.1600(6) 0.035(6) Uiso 1 2 d S . . 
O6 O 0.2509(12) 0.3157(11) 0.0000 0.041(6) Uiso 1 2 d S . . 
O7 O 0.1429(8) 0.2597(8) 0.0473(5) 0.041(4) Uiso 1 1 d . . . 
O8 O 0.0762(9) 0.3858(8) 0.0777(5) 0.047(5) Uiso 1 1 d . . . 
O9 O 0.2502(15) 0.0000 0.1870(8) 0.063(8) Uiso 1 2 d S . . 
O10 O 0.0000 0.4123(14) 0.1519(8) 0.064(8) Uiso 1 2 d S . . 
O11 O 0.2243(10) 0.4126(9) 0.0606(5) 0.054(5) Uiso 1 1 d . . . 
O12 O 0.1181(9) 0.1868(8) 0.2146(5) 0.041(4) Uiso 1 1 d . . . 
O13 O 0.2414(11) 0.1856(10) 0.1746(6) 0.065(6) Uiso 1 1 d . . . 
O14 O 0.2282(11) 0.1034(10) 0.2430(6) 0.066(6) Uiso 1 1 d . . . 
O15 O 0.2325(11) 0.1513(10) 0.0886(6) 0.068(6) Uiso 1 1 d . . . 
O16 O 0.1175(10) 0.3600(9) 0.1094(5) 0.054(5) Uiso 1 1 d . . . 
O17 O 0.0796(9) 0.1277(9) 0.2307(5) 0.052(5) Uiso 1 1 d . . . 
O18 O 0.0659(10) 0.2830(9) 0.1689(6) 0.062(6) Uiso 1 1 d . . . 
O19 O 0.2870(11) 0.1252(10) 0.1713(6) 0.065(6) Uiso 1 1 d . . . 
O20 O 0.2886(10) 0.2865(9) 0.0752(5) 0.055(5) Uiso 1 1 d . . . 
O21 O 0.0000 0.2565(13) 0.2430(8) 0.062(8) Uiso 1 2 d S . . 
O22 O 0.2404(12) 0.2929(11) 0.1106(6) 0.079(7) Uiso 1 1 d . . . 
O23 O 0.3717(15) 0.2396(14) 0.1427(9) 0.118(10) Uiso 1 1 d . . . 
O24 O 0.3769(19) 0.1656(16) 0.0604(10) 0.143(12) Uiso 1 1 d . . . 
O25 O 0.383(2) 0.103(2) 0.0874(12) 0.191(17) Uiso 1 1 d . . . 
 
loop_ 
 _atom_site_aniso_label 
 _atom_site_aniso_U_11 
 _atom_site_aniso_U_22 
 _atom_site_aniso_U_33 
 _atom_site_aniso_U_23 
 _atom_site_aniso_U_13 
 _atom_site_aniso_U_12 
U1 0.0460(8) 0.0268(7) 0.0413(8) 0.0007(6) 0.000 0.000 
U2 0.0580(10) 0.0247(7) 0.0411(9) 0.0001(6) 0.000 0.000 
U3 0.0388(6) 0.0405(6) 0.0492(6) 0.0079(5) -0.0062(5) -0.0072(5) 
U4 0.0482(6) 0.0296(5) 0.0592(7) 0.0037(5) -0.0169(5) -0.0046(5) 
U5 0.0322(6) 0.0905(10) 0.1167(13) 0.0517(9) -0.0070(7) -0.0014(6) 
 
_geom_special_details 
; 
 All esds (except the esd in the dihedral angle between two l.s. planes) 
 are estimated using the full covariance matrix.  The cell esds are taken 
 into account individually in the estimation of esds in distances, angles 
 and torsion angles; correlations between esds in cell parameters are only 
 used when they are defined by crystal symmetry.  An approximate (isotropic) 
 treatment of cell esds is used for estimating esds involving l.s. planes. 
; 
 
loop_ 
 _geom_bond_atom_site_label_1 
 _geom_bond_atom_site_label_2 
 _geom_bond_distance 
 _geom_bond_site_symmetry_2 
 _geom_bond_publ_flag 
U1 O4 1.80(2) . ? 
U1 O10 1.89(3) . ? 
U1 O8 2.341(17) 12 ? 
U1 O8 2.341(17) . ? 
U1 O16 2.357(18) 12 ? 
U1 O16 2.357(19) . ? 
U1 O18 2.38(2) . ? 
U1 O18 2.38(2) 12 ? 
U1 U2 3.968(2) . ? 
U2 O21 1.80(3) . ? 
U2 O5 1.81(2) . ? 
U2 O12 2.351(17) . ? 
U2 O12 2.351(17) 12 ? 
U2 O18 2.39(2) 12 ? 
U2 O18 2.39(2) . ? 
U2 O17 2.416(18) 12 ? 
U2 O17 2.416(18) . ? 
U3 O7 1.761(16) . ? 
U3 O11 1.821(18) . ? 
U3 O16 2.324(19) . ? 
U3 O6 2.375(14) . ? 
U3 O20 2.380(19) . ? 
U3 O22 2.38(2) . ? 
U3 O3 2.390(13) . ? 
U3 O8 2.445(17) . ? 
U3 U3 3.870(2) 10 ? 
U4 O14 1.76(2) . ? 
U4 O1 1.838(15) . ? 
U4 O19 2.35(2) . ? 
U4 O12 2.372(16) . ? 
U4 O9 2.377(17) . ? 
U4 O17 2.380(18) . ? 
U4 O2 2.391(16) . ? 
U4 O13 2.40(2) . ? 
U4 U4 3.870(2) 11 ? 
U5 O15 1.84(2) . ? 
U5 O23 1.93(3) . ? 
U5 O13 2.38(2) . ? 
U5 O22 2.38(2) . ? 
U5 O20 2.395(19) . ? 
U5 O19 2.44(2) . ? 
U5 O24 2.47(4) . ? 
U5 O25 2.64(4) . ? 
O2 U4 2.391(16) 11 ? 
O3 U3 2.390(13) 10 ? 
O6 U3 2.375(14) 10 ? 
O8 O16 1.46(2) . ? 
O9 U4 2.377(17) 11 ? 
O12 O17 1.54(2) . ? 
O13 O19 1.54(3) . ? 
O20 O22 1.55(3) . ? 
O24 O25 1.61(5) . ? 
 
loop_ 
 _geom_angle_atom_site_label_1 
 _geom_angle_atom_site_label_2 
 _geom_angle_atom_site_label_3 
 _geom_angle 
 _geom_angle_site_symmetry_1 
 _geom_angle_site_symmetry_3 
 _geom_angle_publ_flag 
O4 U1 O10 179.8(11) . . ? 
O4 U1 O8 89.6(7) . 12 ? 
O10 U1 O8 90.6(8) . 12 ? 
O4 U1 O8 89.6(7) . . ? 
O10 U1 O8 90.6(8) . . ? 
O8 U1 O8 78.0(8) 12 . ? 
O4 U1 O16 93.9(5) . 12 ? 
O10 U1 O16 86.2(5) . 12 ? 
O8 U1 O16 36.3(6) 12 12 ? 
O8 U1 O16 114.1(6) . 12 ? 
O4 U1 O16 93.9(5) . . ? 
O10 U1 O16 86.2(5) . . ? 
O8 U1 O16 114.1(7) 12 . ? 
O8 U1 O16 36.3(6) . . ? 
O16 U1 O16 149.2(9) 12 . ? 
O4 U1 O18 90.1(8) . . ? 
O10 U1 O18 89.7(9) . . ? 
O8 U1 O18 173.3(6) 12 . ? 
O8 U1 O18 108.6(6) . . ? 
O16 U1 O18 137.1(7) 12 . ? 
O16 U1 O18 72.6(7) . . ? 
O4 U1 O18 90.1(8) . 12 ? 
O10 U1 O18 89.7(9) . 12 ? 
O8 U1 O18 108.6(6) 12 12 ? 
O8 U1 O18 173.3(6) . 12 ? 
O16 U1 O18 72.6(7) 12 12 ? 
O16 U1 O18 137.1(7) . 12 ? 
O18 U1 O18 64.7(10) . 12 ? 
O4 U1 U2 79.7(7) . . ? 
O10 U1 U2 100.1(9) . . ? 
O8 U1 U2 139.7(4) 12 . ? 
O8 U1 U2 139.7(4) . . ? 
O16 U1 U2 105.3(5) 12 . ? 
O16 U1 U2 105.3(5) . . ? 
O18 U1 U2 33.8(5) . . ? 
O18 U1 U2 33.8(5) 12 . ? 
O21 U2 O5 177.6(11) . . ? 
O21 U2 O12 86.9(4) . . ? 
O5 U2 O12 93.6(4) . . ? 
O21 U2 O12 86.9(4) . 12 ? 
O5 U2 O12 93.6(4) . 12 ? 
O12 U2 O12 152.7(8) . 12 ? 
O21 U2 O18 87.7(9) . 12 ? 
O5 U2 O18 90.3(7) . 12 ? 
O12 U2 O18 135.3(6) . 12 ? 
O12 U2 O18 70.9(6) 12 12 ? 
O21 U2 O18 87.7(9) . . ? 
O5 U2 O18 90.3(7) . . ? 
O12 U2 O18 70.9(6) . . ? 
O12 U2 O18 135.3(6) 12 . ? 
O18 U2 O18 64.5(10) 12 . ? 
O21 U2 O17 94.4(8) . 12 ? 
O5 U2 O17 87.4(7) . 12 ? 
O12 U2 O17 116.5(6) . 12 ? 
O12 U2 O17 37.7(6) 12 12 ? 
O18 U2 O17 108.1(6) 12 12 ? 
O18 U2 O17 172.3(6) . 12 ? 
O21 U2 O17 94.4(8) . . ? 
O5 U2 O17 87.4(7) . . ? 
O12 U2 O17 37.7(6) . . ? 
O12 U2 O17 116.5(6) 12 . ? 
O18 U2 O17 172.3(6) 12 . ? 
O18 U2 O17 108.1(6) . . ? 
O17 U2 O17 79.1(9) 12 . ? 
O21 U2 U1 97.6(9) . . ? 
O5 U2 U1 80.0(7) . . ? 
O12 U2 U1 103.6(4) . . ? 
O12 U2 U1 103.6(4) 12 . ? 
O18 U2 U1 33.7(5) 12 . ? 
O18 U2 U1 33.7(5) . . ? 
O17 U2 U1 138.6(4) 12 . ? 
O17 U2 U1 138.6(4) . . ? 
O7 U3 O11 176.3(8) . . ? 
O7 U3 O16 95.5(7) . . ? 
O11 U3 O16 87.5(7) . . ? 
O7 U3 O6 88.0(8) . . ? 
O11 U3 O6 89.0(8) . . ? 
O16 U3 O6 176.3(7) . . ? 
O7 U3 O20 93.0(7) . . ? 
O11 U3 O20 88.0(7) . . ? 
O16 U3 O20 109.3(6) . . ? 
O6 U3 O20 71.8(7) . . ? 
O7 U3 O22 90.8(8) . . ? 
O11 U3 O22 92.2(8) . . ? 
O16 U3 O22 71.7(7) . . ? 
O6 U3 O22 109.7(7) . . ? 
O20 U3 O22 38.1(7) . . ? 
O7 U3 O3 88.1(8) . . ? 
O11 U3 O3 88.9(8) . . ? 
O16 U3 O3 108.6(6) . . ? 
O6 U3 O3 70.2(7) . . ? 
O20 U3 O3 141.9(6) . . ? 
O22 U3 O3 178.9(8) . . ? 
O7 U3 O8 93.9(7) . . ? 
O11 U3 O8 87.3(7) . . ? 
O16 U3 O8 35.6(6) . . ? 
O6 U3 O8 143.0(6) . . ? 
O20 U3 O8 144.8(6) . . ? 
O22 U3 O8 107.3(7) . . ? 
O3 U3 O8 72.9(6) . . ? 
O7 U3 U3 80.6(5) . 10 ? 
O11 U3 U3 95.7(6) . 10 ? 
O16 U3 U3 143.9(5) . 10 ? 
O6 U3 U3 35.4(5) . 10 ? 
O20 U3 U3 106.7(5) . 10 ? 
O22 U3 U3 143.7(6) . 10 ? 
O3 U3 U3 35.9(4) . 10 ? 
O8 U3 U3 108.5(4) . 10 ? 
O14 U4 O1 176.8(8) . . ? 
O14 U4 O19 84.0(8) . . ? 
O1 U4 O19 94.1(7) . . ? 
O14 U4 O12 88.5(8) . . ? 
O1 U4 O12 94.5(6) . . ? 
O19 U4 O12 108.1(6) . . ? 
O14 U4 O9 89.1(9) . . ? 
O1 U4 O9 87.8(8) . . ? 
O19 U4 O9 71.3(7) . . ? 
O12 U4 O9 177.6(8) . . ? 
O14 U4 O17 89.6(8) . . ? 
O1 U4 O17 93.5(7) . . ? 
O19 U4 O17 145.7(7) . . ? 
O12 U4 O17 37.9(6) . . ? 
O9 U4 O17 142.4(7) . . ? 
O14 U4 O2 90.6(9) . . ? 
O1 U4 O2 89.3(8) . . ? 
O19 U4 O2 141.2(7) . . ? 
O12 U4 O2 110.1(7) . . ? 
O9 U4 O2 70.2(8) . . ? 
O17 U4 O2 72.2(7) . . ? 
O14 U4 O13 88.7(8) . . ? 
O1 U4 O13 91.4(7) . . ? 
O19 U4 O13 37.8(7) . . ? 
O12 U4 O13 70.7(6) . . ? 
O9 U4 O13 108.9(7) . . ? 
O17 U4 O13 108.6(6) . . ? 
O2 U4 O13 178.9(8) . . ? 
O14 U4 U4 97.0(7) . 11 ? 
O1 U4 U4 81.0(5) . 11 ? 
O19 U4 U4 106.6(5) . 11 ? 
O12 U4 U4 145.3(4) . 11 ? 
O9 U4 U4 35.5(6) . 11 ? 
O17 U4 U4 107.6(4) . 11 ? 
O2 U4 U4 36.0(5) . 11 ? 
O13 U4 U4 143.3(5) . 11 ? 
O15 U5 O23 178.7(11) . . ? 
O15 U5 O13 93.2(8) . . ? 
O23 U5 O13 86.6(10) . . ? 
O15 U5 O22 91.6(8) . . ? 
O23 U5 O22 87.1(10) . . ? 
O13 U5 O22 83.0(7) . . ? 
O15 U5 O20 91.3(8) . . ? 
O23 U5 O20 87.7(10) . . ? 
O13 U5 O20 120.9(7) . . ? 
O22 U5 O20 38.0(7) . . ? 
O15 U5 O19 92.6(8) . . ? 
O23 U5 O19 88.0(10) . . ? 
O13 U5 O19 37.2(6) . . ? 
O22 U5 O19 120.2(7) . . ? 
O20 U5 O19 158.0(7) . . ? 
O15 U5 O24 86.0(11) . . ? 
O23 U5 O24 94.7(12) . . ? 
O13 U5 O24 160.5(10) . . ? 
O22 U5 O24 116.5(10) . . ? 
O20 U5 O24 78.6(9) . . ? 
O19 U5 O24 123.3(9) . . ? 
O15 U5 O25 84.7(12) . . ? 
O23 U5 O25 96.5(13) . . ? 
O13 U5 O25 124.0(11) . . ? 
O22 U5 O25 152.9(11) . . ? 
O20 U5 O25 115.1(11) . . ? 
O19 U5 O25 86.8(11) . . ? 
O24 U5 O25 36.6(11) . . ? 
U4 O2 U4 108.0(11) 11 . ? 
U3 O3 U3 108.1(9) 10 . ? 
U3 O6 U3 109.1(9) 10 . ? 
O16 O8 U1 72.4(10) . . ? 
O16 O8 U3 67.6(10) . . ? 
U1 O8 U3 123.2(7) . . ? 
U4 O9 U4 109.0(11) . 11 ? 
O17 O12 U2 73.4(9) . . ? 
O17 O12 U4 71.3(9) . . ? 
U2 O12 U4 126.3(7) . . ? 
O19 O13 U5 73.4(11) . . ? 
O19 O13 U4 69.1(11) . . ? 
U5 O13 U4 127.0(9) . . ? 
O8 O16 U3 76.7(10) . . ? 
O8 O16 U1 71.3(10) . . ? 
U3 O16 U1 128.2(8) . . ? 
O12 O17 U4 70.8(9) . . ? 
O12 O17 U2 68.9(9) . . ? 
U4 O17 U2 123.0(8) . . ? 
U1 O18 U2 112.5(8) . . ? 
O13 O19 U4 73.0(11) . . ? 
O13 O19 U5 69.4(11) . . ? 
U4 O19 U5 126.9(9) . . ? 
O22 O20 U3 71.1(11) . . ? 
O22 O20 U5 70.6(11) . . ? 
U3 O20 U5 126.4(8) . . ? 
O20 O22 U5 71.5(11) . . ? 
O20 O22 U3 70.8(11) . . ? 
U5 O22 U3 126.7(10) . . ? 
O25 O24 U5 77(2) . . ? 
O24 O25 U5 66(2) . . ? 
 
_diffrn_measured_fraction_theta_max    0.999 
_diffrn_reflns_theta_full              25.00 
_diffrn_measured_fraction_theta_full   0.999 
_refine_diff_density_max    2.148 
_refine_diff_density_min   -2.711 
_refine_diff_density_rms    0.457 
